# Supplementary material for: Novel bacterial lineages assembled from wastewater-impacted river metagenomes unveil ecosystem functions and risk of antibiotic resistance spread in the community
Source: Research Square preprint supplement (doi:10.21203/rs.3.rs-6408497/v1), 2025-04-28
Supplement: Supplementary file 1 [file 0def519c3110a7bbdccc5134.xlsx]

## Sheet: ARG-MGE
			Chromosome/Plasmid partitioning system			Recombinases			Resolvases/Integrases and associated proteins			Transposon associated proteins												Prophage/Phage associated homing endonucleases and other proteins
			Par proteins		Other proteins	Tyrosine recombinase		Additional recombinases	Resolvase	Integrase	Associated proteins (TinR and others)	Conjugative transposon associated proteins									IS element associated proteins			Phage-associated homing endonuclease	HNH homing endonuclease	Additional proteins (CP4-6 integrases and others)
			parA	parB		xerC	xerD					traA	traB	traC	traE	traF	traG	traH	traN	traV and others	insH	insQ	Others
Phylum: Bacteroidota	Prevotella	APR207	Present	Present	Absent	Present	Present	Present	Absent	Present (Multiple)	Absent	Absent	Absent	Absent	Present (Multiple)	Present	Present	Absent	Absent	Absent	Absent	Absent	Present	Present	Present	Absent
		APR301	Present	Present	Absent	Present	Present	Present (Multiple)	Absent	Absent	Absent	Absent	Absent	Absent	Absent	Absent	Absent	Absent	Absent	Absent	Absent	Absent	Absent	Absent	Absent	Absent
	Paludibacter	APR314	Present	Present (Multiple)	Absent	Present	Present	Absent	Absent	Present	Absent	Absent	Absent	Absent	Absent	Absent	Absent	Absent	Absent	Absent	Absent	Absent	Absent	Absent	Present (Multiple)	Absent
	Macellibacteroides	APR304	Present	Present	Absent	Absent	Present	Present	Absent	Absent	Absent	Absent	Absent	Absent	Absent	Absent	Absent	Present	Absent	Absent	Absent	Absent	Present	Absent	Absent	Absent
	Bacteroides	APR209	Present	Present	Absent	Present	Present	Absent	Absent	Absent	Absent	Absent	Absent	Absent	Absent	Absent	Absent	Absent	Absent	Absent	Absent	Absent	Absent	Absent	Present	Present
		APR302	Present	Present	Absent	Present	Present	Absent	Absent	Present	Absent	Absent	Absent	Absent	Absent	Absent	Absent	Absent	Absent	Absent	Absent	Absent	Absent	Absent	Absent	Absent
Phylum: Desulfobacterota	Trichlorobacter	APR308	Present (Multiple)	Present	Absent	Present	Present	Absent	Absent	Present	Present	Present	Present	Present	Absent	Absent	Present	Present	Present	Present (Multiple)	Absent	Present	Absent	Absent	Absent	Absent
Phylum: Epsilonproteobacteria	Sulfurospirillum	APR208	Present (Multiple)	Present (Multiple)	Absent	Present	Present	Present (Multiple)	Absent	Present (Multiple)	Present (Multiple)	Absent	Absent	Absent	Absent	Absent	Absent	Absent	Absent	Absent	Absent	Present (Multiple)	Present (Multiple)	Absent	Absent	Absent
Phylum: Pseudomonadota	Pseudomonas	APR310	Present	Present	Absent	Absent	Present	Absent	Present	Present (Multiple)	Absent	Absent	Absent	Absent	Absent	Absent	Absent	Absent	Absent	Absent	Absent	Absent	Present	Absent	Absent	Present
	Aquaspirillum	APR307	Present (Multiple)	Present (Multiple)	Absent			Present (Multiple)	Absent	Present (Multiple)	Absent	Absent	Absent	Absent	Absent	Absent	Absent	Absent	Absent	Absent	Absent	Absent	Absent	Absent	Absent
	Fluviibacter	APR306	Present	Present	Absent	Present	Present	Present	Absent	Present (Multiple)	Absent	Absent	Absent	Absent	Absent	Absent	Absent	Absent	Absent	Absent	Absent	Present (Multiple)	Absent	Absent	Absent	Present
	Macromonas	APR201	Present	Present	Absent	Present	Present	Present (Multiple)	Absent	Absent	Present	Absent	Absent	Absent	Absent	Absent	Absent	Absent	Absent	Absent	Present	Present	Present	Absent	Absent	Present
		APR303	Present (Multiple)	Present	Absent	Present	Present	Present (Multiple)	Absent	Present (Multiple)	Absent	Absent	Absent	Absent	Absent	Absent	Absent	Absent	Absent	Absent	Absent	Present (Multiple)	Absent	Absent	Absent	Present
	Aquabacterium	APR203	Present	Present (Multiple)	Present	Present	Present	Present (Multiple)	Absent	Present	Absent	Absent	Absent	Absent	Absent	Absent	Absent	Absent	Absent	Absent	Absent	Absent	Absent	Absent	Absent	Present (Multiple)
