# Supplementary material for: Novel bacterial lineages assembled from wastewater-impacted river metagenomes unveil ecosystem functions and risk of antibiotic resistance spread in the community
Source: Research Square preprint supplement (doi:10.21203/rs.3.rs-6408497/v1), 2025-04-28
Supplement: Supplementary file 2 [file 8107199042c14b321010689e.xlsx]

## Sheet: APR201
	Contig	Function
HMR	k141_145927_462_1367	Cobalt-zinc-cadmium resistance protein
HDD	k141_136670_109_1473	Benzoate 1,2-dioxygenase alpha subunit (EC 1.14.12.10)
	k141_136670_1496_1984	Benzoate 1,2-dioxygenase beta subunit (EC 1.14.12.10)
	k141_136670_2006_2344	Benzoate 1,2-dioxygenase, ferredoxin reductase component
	k141_15289_37016_38221	P-hydroxybenzoate hydroxylase (EC 1.14.13.2)
	k141_170415_2165_954	3-hydroxybenzoate 6-monooxygenase (EC 1.14.13.24)
	k141_18433_1264_2295	2-polyprenylphenol hydroxylase and related flavodoxin oxidoreductases / CDP-6-deoxy-delta-3,4-glucoseen reductase
	k141_209632_4107_3163	Alkanesulfonate utilization operon LysR-family regulator Cbl
	k141_232098_740_1819	Alkanesulfonates-binding protein
	k141_232098_1861_2733	Alkanesulfonates transport system permease protein
	k141_232098_2748_3542	Alkanesulfonates transport system permease protein
	k141_239795_17687_16782	4-hydroxybenzoate polyprenyltransferase (EC 2.5.1.39)
	k141_240945_986_159	Multicopper polyphenol oxidase
	k141_241697_925_2	Catechol 1,2-dioxygenase (EC 1.13.11.1)
	k141_241916_1699_2277	Anthranilate synthase, amidotransferase component (EC 4.1.3.27) / Para-aminobenzoate synthase, amidotransferase component (EC 2.6.1.85)
	k141_243200_2881_4170	benzoate MFS transporter BenK
	k141_25462_2056_833	Putative n-hydroxybenzoate hydroxylase
	k141_270534_963_1	benzoate MFS transporter BenK
	k141_270534_2725_1919	Benzoate 1,2-dioxygenase, ferredoxin reductase component
	k141_294070_16284_15757	benzoate MFS transporter BenK
	k141_294197_5280_6470	Benzoate transport protein
	k141_31975_5107_3416	2-polyprenyl-6-methoxyphenol hydroxylase and related FAD-dependent oxidoreductases
	k141_6962_11989_13116	ABC transporter, substrate-binding protein (cluster 4, leucine/isoleucine/valine/benzoate)
MGE	k141_124975_9566_10351	Chromosome (plasmid) partitioning protein ParA
	k141_124975_10971_11978	Chromosome (plasmid) partitioning protein ParB
	k141_129335_2713_1166	IS, phage, Tn; Transposon-related functions
	k141_13471_8316_9653	Prophage CP4-6 integrase
	k141_137660_1693_2316	Resolvase/Integrase TinR protein
	k141_180933_704_1696	Site-specific tyrosine recombinase XerD
	k141_249473_7005_5905	Site-specific tyrosine recombinase XerC
	k141_282876_1387_2646	Probable integrase/recombinase protein
	k141_4889_1567_2607	Putative transposase InsQ for insertion sequence element IS609
	k141_73080_2150_1302	Transposase InsH for insertion sequence element IS5
	k141_73464_3178_1184	Site-specific recombinase
PVD	k141_100909_11709_12623	Ribosome small subunit biogenesis RbfA-release protein RsgA
	k141_106966_665_459	Antitoxin to Toxin 1, PIN domain
	k141_107868_7099_5954	Peptide chain release factor 3
	k141_147444_6067_5372	Lipoprotein-releasing system ATP-binding protein LolD
	k141_147444_7316_6060	Lipoprotein releasing system transmembrane protein LolC/LolE
	k141_189842_2747_2439	Antitoxin HigA
	k141_189842_3044_2763	Toxin HigB
	k141_200034_6458_6757	Succinate dehydrogenase flavin-adding protein, antitoxin of CptAB toxin-antitoxin
	k141_201630_812_1255	Ribosome association toxin RatA
	k141_240118_1187_861	Programmed cell death toxin YdcE
	k141_240945_2325_1000	Hemolysins and related proteins containing CBS domains
	k141_242039_6261_5980	Antitoxin DinJ (binds YafQ toxin)
	k141_274782_2630_2400	RTX toxins and related Ca2+-binding proteins
	k141_44604_1202_1528	RelE-like translational repressor toxin
	k141_54240_9862_8885	Peptide chain release factor 2
	k141_84192_5159_6274	Peptide chain release factor 1
	k141_84192_6271_7212	Peptide chain release factor N(5)-glutamine methyltransferase (EC 2.1.1.297)
QS	k141_106154_9956_10582	Two-component transcriptional response regulator, LuxR family
	k141_118531_6421_7878	Efflux ABC transporter, permease/ATP-binding protein Reut_A2584
	k141_146350_10470_12320	Efflux ABC transporter, permease/ATP-binding protein Atu2242
	k141_147009_1065_1940	Auxin efflux carrier family protein
	k141_148254_2001_1	RND efflux system, inner membrane transporter
	k141_149598_912_2333	Efflux transport system, outer membrane factor (OMF) lipoprotein
	k141_157976_7_354	Macrolide-specific efflux protein MacA
	k141_157976_2075_576	Efflux transport system, outer membrane factor (OMF) lipoprotein
	k141_172400_8149_7490	Regulatory protein, LuxR:Response regulator receiver
	k141_176744_8007_7378	Two-component transcriptional response regulator, LuxR family
	k141_198949_7146_8294	RND efflux system, membrane fusion protein
	k141_198949_8294_10504	RND efflux system, inner membrane transporter
	k141_200025_3934_3731	Efflux transport system, outer membrane factor (OMF) lipoprotein
	k141_208858_10195_11967	Efflux ABC transporter, permease/ATP-binding protein
	k141_222109_4308_7292	RND efflux system, inner membrane transporter
	k141_228684_2524_1673	Two-component transcriptional response regulator, LuxR family
	k141_250665_5797_5042	Efflux ABC transporter, permease protein
	k141_250665_6717_5794	Efflux ABC transporter, ATP-binding protein
	k141_253205_6864_6283	PAS domain with LuxR-type DNA-binding domain
	k141_260162_6229_5546	Potassium efflux system KefA protein / Small-conductance mechanosensitive channel
	k141_264022_12793_11807	Two-component transcriptional response regulator, LuxR family
	k141_264620_3722_3925	Efflux transport system, outer membrane factor (OMF) lipoprotein
	k141_273393_1_771	Efflux transport system, outer membrane factor (OMF) lipoprotein
	k141_296843_3_2522	RND efflux system, inner membrane transporter
	k141_301602_2402_4267	Efflux ABC transporter, permease/ATP-binding protein mlr7818
	k141_3032_2783_1875	Magnesium and cobalt efflux protein CorC
	k141_307066_2344_893	Efflux transport system, outer membrane factor (OMF) lipoprotein
	k141_307066_2648_2358	RND efflux system, inner membrane transporter
	k141_315179_2_1423	Efflux transport system, outer membrane factor (OMF) lipoprotein
	k141_54089_1152_1	RND efflux system, inner membrane transporter
	k141_54089_2456_1155	RND efflux system, membrane fusion protein
	k141_71883_875_3	RND efflux system, inner membrane transporter KPN_02144
SMP	k141_241916_3500_3856	Indole-3-glycerol phosphate synthase (EC 4.1.1.48)
	k141_249782_2042_1464	Indole-3-glycerol phosphate synthase (EC 4.1.1.48)
SR	k141_106175_1343_2749	Glutathione reductase (EC 1.8.1.7)
	k141_1174_10305_10802	Copper metallochaperone PCu(A)C, inserts Cu(I) into cytochrome oxidase subunit II
	k141_146454_448_2388	Chaperone protein HtpG
	k141_146478_5465_4173	DnaK-related protein
	k141_158779_4051_5937	DnaK-related protein
	k141_158779_5949_8369	DnaK-related protein
	k141_158779_8451_8528	DnaK-related protein
	k141_161456_2330_3448	S-(hydroxymethyl)glutathione dehydrogenase (EC 1.1.1.284)
	k141_167523_9869_10450	Superoxide dismutase [Fe] (EC 1.15.1.1)
	k141_177843_6142_4772	Periplasmic chaperone and peptidyl-prolyl cis-trans isomerase of outer membrane proteins SurA (EC 5.2.1.8)
	k141_209581_13779_13126	Glutathione S-transferase (EC 2.5.1.18)
	k141_22227_160_1515	HtrA protease/chaperone protein
	k141_22414_1336_989	Glutathione-dependent thiol reductase
	k141_228684_7041_7457	Lactoylglutathione lyase (EC 4.4.1.5)
	k141_25296_2460_2981	Chaperone protein HscB
	k141_25296_2997_3959	Chaperone protein HscA
	k141_267132_6446_5763	Chaperone protein HscA
	k141_284645_2294_2770	Thiol peroxidase, Bcp-type (EC 1.11.1.15)
	k141_297212_3655_4173	Periplasmic chaperone of outer membrane proteins Skp / Outer membrane protein H precursor
	k141_43977_41_331	Heat shock protein 10 kDa family chaperone GroES
	k141_43977_380_2023	Heat shock protein 60 kDa family chaperone GroEL
	k141_74561_107_655	Heat shock protein GrpE
	k141_74561_766_2706	Chaperone protein DnaK
	k141_74561_2823_3965	Chaperone protein DnaJ
	k141_77844_1978_3657	Inner membrane protein translocase and chaperone YidC, long form
	k141_86914_2568_2116	Ribosome-associated heat shock protein implicated in the recycling of the 50S subunit (S4 paralog)

## Sheet: APR203
	Contig	Function
HMR	k141_186967_1976_2893	Cobalt-zinc-cadmium resistance protein
HDD	k141_138657_19872_18829	2-polyprenylphenol hydroxylase and related flavodoxin oxidoreductases / CDP-6-deoxy-delta-3,4-glucoseen reductase
	k141_188726_25535_26416	4-hydroxybenzoate polyprenyltransferase (EC 2.5.1.39)
	k141_198823_18888_19472	Anthranilate synthase, amidotransferase component (EC 4.1.3.27) / Para-aminobenzoate synthase, amidotransferase component (EC 2.6.1.85)
	k141_271575_4988_6196	Benzoate transport protein
	k141_282255_3812_2517	2-polyprenyl-6-methoxyphenol hydroxylase
	k141_293908_8631_9791	Alkane-1 monooxygenase (EC 1.14.15.3)
	k141_300142_11316_12083	Multicopper polyphenol oxidase
	k141_307042_39527_40465	Alkanesulfonate utilization operon LysR-family regulator Cbl
	k141_314758_28354_29943	3-polyprenyl-4-hydroxybenzoate carboxy-lyase (EC 4.1.1.98)
	k141_5556_21472_19622	Para-aminobenzoate synthase, aminase component (EC 2.6.1.85) / Aminodeoxychorismate lyase (EC 4.1.3.38)
MGE	k141_110373_22256_23074	Integrase
	k141_156526_4332_2863	Prophage CP4-6 integrase
	k141_245769_17626_17459	Site-specific recombinases, DNA invertase Pin homologs
	k141_275660_39475_38603	Plasmid replication/partition related protein
	k141_282255_69400_68450	Chromosome (plasmid) partitioning protein ParB
	k141_282255_71088_69478	Recombinase
	k141_288615_1000_263	putative ORF1 [Plasmid pTOM9]
	k141_293366_27674_28567	Site-specific tyrosine recombinase XerD
	k141_321673_11348_9057	DNA primase, phage associated
	k141_321673_12891_12163	Bucepa02001210 protein family (probably prophage associated)
	k141_45282_8017_10128	Site-specific recombinase
	k141_85630_7832_8617	Chromosome (plasmid) partitioning protein ParA
	k141_85630_10771_11649	Chromosome (plasmid) partitioning protein ParB
	k141_85630_24242_23268	Site-specific tyrosine recombinase XerC
PVD	k141_128187_33514_32699	Peptide chain release factor N(5)-glutamine methyltransferase (EC 2.1.1.297)
	k141_128187_34634_33522	Peptide chain release factor 1
	k141_19186_9851_8952	Peptide chain release factor 2
	k141_229014_70560_70871	Antitoxin HigA
	k141_24095_9200_8721	Ribosome association toxin RatA
	k141_263895_16631_16005	Putative hemolysin
	k141_275660_33138_32002	Phospholipase/lecithinase/hemolysin
	k141_275660_35913_35206	Lipoprotein-releasing system ATP-binding protein LolD
	k141_282255_85528_85773	VapB protein (antitoxin to VapC)
	k141_304902_8121_7813	Succinate dehydrogenase flavin-adding protein, antitoxin of CptAB toxin-antitoxin
	k141_321673_7533_7192	Programmed cell death toxin MazF
	k141_38385_23788_22823	Ribosome small subunit biogenesis RbfA-release protein RsgA
	k141_5556_28076_26784	Hemolysins and related proteins containing CBS domains
	k141_67531_14489_13806	Lipoprotein-releasing system ATP-binding protein LolD
	k141_67531_15962_14709	Lipoprotein releasing system transmembrane protein LolC/LolE
	k141_85630_36077_34452	Peptide chain release factor 3
QS	k141_100746_4270_5085	Nickel/cobalt efflux transporter RcnA
	k141_100746_14369_15151	Two-component transcriptional response regulator, LuxR family
	k141_101442_281_27	Two-component transcriptional response regulator, LuxR family
	k141_121112_64685_66445	Efflux ABC transporter, permease/ATP-binding protein
	k141_126413_145_627	Two-component transcriptional response regulator, LuxR family
	k141_126413_52922_52215	Two-component transcriptional response regulator, LuxR family
	k141_138657_4707_2866	Efflux ABC transporter, permease/ATP-binding protein Atu2242
	k141_176029_8648_7983	Two-component transcriptional response regulator, LuxR family
	k141_188726_19586_20875	RND efflux system, membrane fusion protein
	k141_188726_20891_24016	RND efflux system, inner membrane transporter
	k141_188726_24009_25526	Efflux transport system, outer membrane factor (OMF) lipoprotein
	k141_196434_18778_19737	Two-component transcriptional response regulator, LuxR family
	k141_211015_21393_18097	RND efflux system, inner membrane transporter
	k141_214358_27644_28549	Magnesium and cobalt efflux protein CorC
	k141_219268_231_3314	CzcABC family efflux RND transporter, transmembrane protein
	k141_229014_115635_113809	Efflux ABC transporter, permease/ATP-binding protein mlr7818
	k141_267326_14042_11772	Efflux ABC transporter, permease/ATP-binding protein Reut_A2584
	k141_267326_25422_26339	Efflux ABC transporter, ATP-binding protein
	k141_267326_26336_27109	Efflux ABC transporter, permease protein
	k141_285828_54009_55331	Potassium efflux system KefA protein / Small-conductance mechanosensitive channel
	k141_285828_63550_66579	RND efflux system, inner membrane transporter
	k141_293366_17014_15572	Efflux transport system, outer membrane factor (OMF) lipoprotein
	k141_300142_19788_21017	Macrolide-specific efflux protein MacA
	k141_300142_22995_24401	Efflux transport system, outer membrane factor (OMF) lipoprotein
	k141_315869_2079_3329	RND efflux system, membrane fusion protein
	k141_315869_3341_4843	RND efflux system, inner membrane transporter
	k141_53641_9783_12002	CzcABC family efflux RND transporter, transmembrane protein
	k141_67531_60718_63906	RND efflux system, inner membrane transporter
	k141_71356_872_231	Two-component transcriptional response regulator, LuxR family
	k141_75018_11244_13112	Two-component transcriptional response regulator, LuxR family
	k141_79695_14677_12878	Efflux ABC transporter, permease/ATP-binding protein
	k141_79695_15302_16810	Outer membrane factor (OMF) lipoprotein associated wth EmrAB-OMF efflux system
	k141_79695_16807_18051	Multidrug efflux system EmrAB-OMF, membrane fusion component EmrA
	k141_79695_18054_19622	Multidrug efflux system EmrAB-OMF, inner-membrane proton/drug antiporter EmrB (MFS type)
	k141_8550_3156_4319	CzcABC family efflux RND transporter, membrane fusion protein
	k141_8550_4338_7478	RND efflux system, inner membrane transporter
SMP	k141_198823_2065_824	Tryptophan synthase (indole-salvaging) (EC 4.2.1.122)
	k141_198823_20550_21350	Indole-3-glycerol phosphate synthase (EC 4.1.1.48)
	k141_295187_24014_27565	Indolepyruvate ferredoxin oxidoreductase, alpha and beta subunits
SR	k141_115798_2013_2537	Chaperone protein HscB
	k141_115798_2553_4421	Chaperone protein HscA
	k141_121112_31545_30799	Glutathione S-transferase (EC 2.5.1.18)
	k141_140972_30_611	Superoxide dismutase [Fe] (EC 1.15.1.1)
	k141_188726_7080_5683	Periplasmic chaperone and peptidyl-prolyl cis-trans isomerase of outer membrane proteins SurA (EC 5.2.1.8)
	k141_189583_11041_10532	Periplasmic chaperone of outer membrane proteins Skp / Outer membrane protein H precursor
	k141_214358_531_2072	HtrA protease/chaperone protein
	k141_221864_19355_20011	Hydroxyacylglutathione hydrolase (EC 3.1.2.6)
	k141_224152_1073_3286	Catalase-peroxidase KatG (EC 1.11.1.21)
	k141_224152_23169_24035	Glutathione S-transferase (EC 2.5.1.18)
	k141_229014_27605_28225	Glutathione S-transferase family protein
	k141_233733_6800_5472	Uncharacterized chaperone protein YegD
	k141_24138_178_2	Superoxide dismutase [Fe] (EC 1.15.1.1)
	k141_266669_2718_3806	Inner membrane protein translocase and chaperone YidC, long form
	k141_271575_6193_7152	Glutathione synthetase (EC 6.3.2.3)
	k141_282255_10930_11415	Glutathione peroxidase (EC 1.11.1.9) / Thioredoxin peroxidase (EC 1.11.1.15)
	k141_283081_3185_1986	Chaperone protein DnaJ
	k141_283081_5177_3243	Chaperone protein DnaK
	k141_283081_5846_5307	Heat shock protein GrpE
	k141_283081_6355_5924	Ribosome-associated heat shock protein implicated in the recycling of the 50S subunit (S4 paralog)
	k141_291319_9737_10102	FIG138056: a glutathione-dependent thiol reductase
	k141_300142_24440_25150	Glutathione S-transferase (EC 2.5.1.18)
	k141_303813_2011_2412	Lactoylglutathione lyase and related lyases
	k141_303813_32220_29551	T6SS AAA+ chaperone ClpV (TssH)
	k141_307042_41932_42222	Heat shock protein 10 kDa family chaperone GroES
	k141_307042_42273_43919	Heat shock protein 60 kDa family chaperone GroEL
	k141_314758_46380_44482	Chaperone protein HtpG
	k141_44305_6558_9155	Chaperone protein ClpB (ATP-dependent unfoldase)
	k141_44683_68828_69427	Glutathione peroxidase (EC 1.11.1.9)
	k141_45500_7357_9033	Inner membrane protein translocase and chaperone YidC, long form
	k141_5556_19548_19129	Lactoylglutathione lyase (EC 4.4.1.5)
	k141_67531_1560_2039	Thiol peroxidase, Bcp-type (EC 1.11.1.15)
	k141_75018_56755_55850	Zn-dependent protease with chaperone function PA4632
ARG	Contig	Drug Class	Resistance Mechanism	AMR Gene Family
	k141_23248_16	disinfecting agents and antiseptics	antibiotic efflux	small multidrug resistance (SMR) antibiotic efflux pump

## Sheet: APR207
	Contig	Function
HMR	k141_13116_1_438	Putative manganese efflux pump MntP
	k141_139240_362_1477	Cobalt-zinc-cadmium resistance protein
	k141_185703_5858_4473	Multi antimicrobial extrusion protein (Na(+)/drug antiporter), MATE family of MDR efflux pumps
	k141_77568_4922_6310	Na+-driven multidrug efflux pump
HDD	k141_217421_742_122	Anthranilate synthase, amidotransferase component (EC 4.1.3.27) / Para-aminobenzoate synthase, amidotransferase component (EC 2.6.1.85)
MGE	k141_120215_564_1	Conjugative transposon protein TraK
	k141_143303_718_1482	Chromosome (plasmid) partitioning protein ParA
	k141_143303_1543_2433	Chromosome (plasmid) partitioning protein ParB
	k141_185677_3351_3136	Integrase
	k141_201292_125_3	Conjugative transposon protein TraF
	k141_201292_516_139	Conjugative transposon protein TraE
	k141_201292_908_573	Conjugative transposon protein TraE
	k141_202534_3339_4217	Site-specific tyrosine recombinase XerC
	k141_219729_2112_1006	Integrase
	k141_237685_3_908	Integrase
	k141_243783_659_3	Phage-associated homing endonuclease
	k141_245856_1_336	Site-specific tyrosine recombinase XerD
	k141_255034_1599_904	HNH homing endonuclease # Phage intron
	k141_257204_2272_1466	Putative transposase InsK for insertion sequence element IS150
	k141_282130_304_2	Integrase/recombinase (XerC/CodV family)
	k141_46690_1855_611	Phage integrase
	k141_84155_2143_3213	Conjugative transposon protein TraG
PVD	k141_10536_9951_10802	Peptide chain release factor 2
	k141_110630_527_3	Hemolysins and related proteins containing CBS domains
	k141_132041_1517_828	Lipoprotein-releasing system ATP-binding protein LolD
	k141_168042_1528_533	Hemolysin A
	k141_168042_2397_1549	Hemolysin A
	k141_184866_2083_2772	Ribosome small subunit biogenesis RbfA-release protein RsgA
	k141_197828_1234_2463	Lipoprotein releasing system transmembrane protein LolC/LolE
	k141_255809_1190_1846	Predicted membrane protein, hemolysin III homolog
	k141_292359_351_1463	Peptide chain release factor 1
	k141_295759_137_442	Antitoxin HigA
	k141_99604_1474_2	Peptide chain release factor 3
QS	k141_122191_4729_3980	Two-component transcriptional response regulator, LuxR family
	k141_128653_1_1554	Bacteriocin/lantibiotic efflux ABC transporter, permease/ATP-binding protein
	k141_13116_1_438	Putative manganese efflux pump MntP
	k141_139384_2362_863	Efflux transport system, outer membrane factor (OMF) lipoprotein BT_3905
	k141_142446_3_314	Two-component transcriptional response regulator, LuxR family
	k141_179334_1299_1	Efflux ABC transporter, ATP-binding protein
	k141_180022_791_312	S-ribosylhomocysteine lyase (EC 4.4.1.21) / Autoinducer-2 production protein LuxS
	k141_185703_5858_4473	Multi antimicrobial extrusion protein (Na(+)/drug antiporter), MATE family of MDR efflux pumps
	k141_226476_2_187	RND efflux system, membrane fusion protein
	k141_226476_214_3477	RND efflux system, inner membrane transporter
	k141_226476_3487_4887	Efflux transport system, outer membrane factor (OMF) lipoprotein
	k141_231980_1668_1	Potassium efflux system KefA protein / Small-conductance mechanosensitive channel
	k141_241783_764_3	RND efflux system, inner membrane transporter
	k141_241783_1846_767	RND efflux system, membrane fusion protein
	k141_24728_1712_1077	Two-component transcriptional response regulator, LuxR family
	k141_286001_671_3	Bacteriocin/lantibiotic efflux ABC transporter, permease/ATP-binding protein
	k141_318108_3_83	RND efflux system, outer membrane lipoprotein CmeC
	k141_320283_2155_2	RND efflux system, inner membrane transporter
	k141_33841_3_698	Outer membrane protein, RND efflux system precursor
	k141_33841_722_1795	Efflux transporter, RND family, MFP subunit, AcrA/E family
	k141_41924_3730_2528	Efflux ABC transporter, permease/ATP-binding protein
	k141_62142_498_1865	Outer membrane efflux protein
	k141_69020_1373_2392	Probable Co/Zn/Cd efflux system membrane fusion protein
	k141_77568_4922_6310	Na+-driven multidrug efflux pump
	k141_81815_5244_6527	Efflux transport system, outer membrane factor (OMF) lipoprotein
	k141_85333_8482_7415	Efflux ABC transporter, permease protein
	k141_85333_9575_8487	Domain of unknown function / Efflux ABC transporter, permease protein
	k141_85333_9783_9580	Efflux ABC transporter, ATP-binding protein
SMP	k141_217421_5099_4872	Indole-3-glycerol phosphate synthase (EC 4.1.1.48)
SR	k141_117205_2486_1920	DJ-1/YajL/PfpI superfamily, includes chaperone protein YajL (former ThiJ), parkinsonism-associated protein DJ-1, peptidases PfpI, Hsp31
	k141_13116_4186_3686	Thiol peroxidase, Tpx-type (EC 1.11.1.15)
	k141_134370_400_2	Inner membrane protein translocase and chaperone YidC, long form
	k141_136909_818_3	Periplasmic chaperone and peptidyl-prolyl cis-trans isomerase of outer membrane proteins SurA (EC 5.2.1.8)
	k141_136909_2252_861	Periplasmic chaperone and peptidyl-prolyl cis-trans isomerase of outer membrane proteins SurA (EC 5.2.1.8)
	k141_143103_5170_5583	Ribosome-associated heat shock protein implicated in the recycling of the 50S subunit (S4 paralog)
	k141_147946_2_1624	Inner membrane protein translocase and chaperone YidC, long form
	k141_150972_2184_274	Chaperone protein DnaK
	k141_155447_1445_771	DnaJ-class molecular chaperone CbpA
	k141_189169_5679_6062	DnaK suppressor protein, putative
	k141_230694_3393_2971	Heat shock protein HtpX
	k141_279731_5911_3428	Chaperone protein ClpB (ATP-dependent unfoldase)
	k141_280106_1_624	Periplasmic chaperone and peptidyl-prolyl cis-trans isomerase of outer membrane proteins SurA (EC 5.2.1.8)
	k141_287798_1_108	Thiol peroxidase, Bcp-type (EC 1.11.1.15)
	k141_3116_2695_3513	Chaperone protein HtpG
	k141_56633_4186_3014	Chaperone protein DnaJ
	k141_56633_4825_4208	Heat shock protein GrpE
	k141_85033_5050_5322	Heat shock protein 10 kDa family chaperone GroES
	k141_85033_5353_6981	Heat shock protein 60 kDa family chaperone GroEL
ARG	Contig	Drug Class	Resistance Mechanism	AMR Gene Family	Antibiotic
	k141_211089_2	tetracycline antibiotic	antibiotic target protection	tetracycline-resistant ribosomal protection protein	tetracycline; doxycycline; minocycline; chlortetracycline; demeclocycline; oxytetracycline
	k141_297765_1	phenicol antibiotic	antibiotic inactivation	chloramphenicol acetyltransferase (CAT)	azidamfenicol; chloramphenicol; thiamphenicol

## Sheet: APR208
	Contig	Function
HMR	k141_117283_18839_19738	Ferrous-iron efflux pump FieF
	k141_31039_3553_4092	Putative manganese efflux pump MntP
HDD	k141_106587_20687_21256	Anthranilate synthase, amidotransferase component (EC 4.1.3.27) / Para-aminobenzoate synthase, amidotransferase component (EC 2.6.1.85)
	k141_120202_7315_7989	Multicopper polyphenol oxidase
	k141_148656_9849_10925	ABC transporter, substrate-binding protein (cluster 4, leucine/isoleucine/valine/benzoate)
	k141_252579_7608_8177	Anthranilate synthase, amidotransferase component (EC 4.1.3.27) / Para-aminobenzoate synthase, amidotransferase component (EC 2.6.1.85)
	k141_261543_19432_18254	ABC transporter, substrate-binding protein (cluster 4, leucine/isoleucine/valine/benzoate)
	k141_273854_1_450	ABC transporter, permease protein 2 (cluster 4, leucine/isoleucine/valine/benzoate)
	k141_273854_447_1214	ABC transporter, ATP-binding protein 1 (cluster 4, leucine/isoleucine/valine/benzoate)
	k141_273854_1207_1902	ABC transporter, ATP-binding protein 2 (cluster 4, leucine/isoleucine/valine/benzoate)
	k141_34633_38532_37570	Para-aminobenzoate synthase, aminase component (EC 2.6.1.85)
MGE	k141_108654_5774_4890	Chromosome (plasmid) partitioning protein ParB
	k141_108893_1983_2936	Site-specific tyrosine recombinase XerC
	k141_12980_5217_4120	Phage integrase
	k141_17911_53691_52921	IncF plasmid conjugative transfer surface exclusion protein TraT
	k141_200644_3266_2142	Phage integrase
	k141_226206_71902_70838	Integrase-recombinase protein XERCD family
	k141_226206_94197_93130	Site-specific recombinase XerD
	k141_278567_3_629	Integrase
	k141_280923_2_487	integrase family protein
	k141_280923_12109_11495	Site-specific recombinase, resolvase family
	k141_282609_3966_2728	Integrase
	k141_294005_37089_36235	Chromosome (plasmid) partitioning protein ParB
	k141_294005_37879_37094	Chromosome (plasmid) partitioning protein ParA
	k141_304331_3296_3856	Phage integrase, site-specific serine recombinase
	k141_33085_3843_4163	Phage integrase
	k141_52289_4369_5214	Chromosome (plasmid) partitioning protein ParA
PVD	k141_1147_4034_3744	Antitoxin HigA
	k141_1147_4312_4034	Toxin HigB
	k141_157021_35891_36517	Predicted membrane protein, hemolysin III homolog
	k141_164491_13258_14460	Lipoprotein releasing system transmembrane protein LolC/LolE
	k141_177786_507_764	Antitoxin DinJ (binds YafQ toxin)
	k141_189405_5469_6563	Peptide chain release factor 2
	k141_209408_829_1989	Toxin HigB / Protein kinase domain of HipA
	k141_23195_9803_8088	Putative hemolysin
	k141_287924_26817_25996	Peptide chain release factor N(5)-glutamine methyltransferase (EC 2.1.1.297)
	k141_291441_4374_3307	Peptide chain release factor 1
	k141_291688_5344_5072	Antitoxin to RelE-like translational repressor toxin
	k141_304331_3891_4229	Toxin HigB
	k141_52289_9838_11088	Toxin HigB / Protein kinase domain of HipA
	k141_92378_5961_6212	RelE/StbE replicon stabilization toxin
	k141_96501_8998_7826	Toxin HigB / Protein kinase domain of HipA
QS	k141_106587_7419_5125	Two-component transcriptional response regulator, LuxR family
	k141_107395_2_490	S-ribosylhomocysteine lyase (EC 4.4.1.21) / Autoinducer-2 production protein LuxS
	k141_112294_36854_37840	Probable Co/Zn/Cd efflux system membrane fusion protein
	k141_112294_37837_40914	CzcABC family efflux RND transporter, transmembrane protein
	k141_117275_1_279	Threonine efflux protein
	k141_117275_12016_13086	Potassium efflux system KefA protein / Small-conductance mechanosensitive channel
	k141_117283_2410_1739	Two-component transcriptional response regulator, LuxR family
	k141_117283_18839_19738	Ferrous-iron efflux pump FieF
	k141_122281_5608_4202	Efflux transport system, outer membrane factor (OMF) lipoprotein
	k141_122281_8735_5610	RND efflux system, inner membrane transporter
	k141_122281_9871_8732	RND efflux system, membrane fusion protein
	k141_132587_2662_5790	RND efflux system, inner membrane transporter
	k141_132587_5780_5881	RND efflux system, outer membrane lipoprotein CmeC
	k141_14066_780_2261	Efflux transport system, outer membrane factor (OMF) lipoprotein
	k141_148656_28761_28135	Threonine efflux protein
	k141_155899_3_257	Macrolide-specific efflux protein MacA
	k141_155899_37607_38518	Auxin efflux carrier family protein
	k141_157426_8150_6345	Efflux ABC transporter, permease/ATP-binding protein
	k141_180027_5784_6161	Cadmium efflux system accessory protein
	k141_191345_2447_1296	RND efflux system, membrane fusion protein
	k141_224355_4758_4597	RND efflux system, outer membrane lipoprotein CmeC
	k141_226206_67435_68085	Two-component transcriptional response regulator, LuxR family
	k141_226206_83979_85220	Multidrug efflux system, outer membrane factor lipoprotein => CmeD
	k141_226206_85217_85915	Multidrug efflux system, membrane fusion component => CmeE
	k141_226206_85919_88948	Multidrug efflux system, inner membrane proton/drug antiporter (RND type) => CmeF
	k141_254580_12615_12358	Two-component transcriptional response regulator, LuxR family
	k141_256102_64676_65836	Multidrug efflux system, membrane fusion component => CmeA
	k141_256102_65840_68968	Multidrug efflux system, inner membrane proton/drug antiporter (RND type) => CmeB
	k141_256102_68958_70382	Multidrug efflux system, outer membrane factor lipoprotein => CmeC
	k141_261543_11693_11028	Two-component transcriptional response regulator, LuxR family
	k141_282609_5611_4964	Two-component transcriptional response regulator, LuxR family
	k141_291588_7593_8234	Two-component transcriptional response regulator, LuxR family
	k141_291588_26773_28122	outer membrane efflux protein
	k141_291688_2528_1686	Efflux ABC transporter, permease/ATP-binding protein Atu2242
	k141_301408_607_1785	Probable sugar efflux transporter
	k141_31039_3553_4092	Putative manganese efflux pump MntP
	k141_318322_10181_8592	RND multidrug efflux transporter; Acriflavin resistance protein
	k141_34227_15561_14938	Homoserine/homoserine lactone efflux protein
	k141_44519_15943_15275	Two-component transcriptional response regulator, LuxR family
	k141_57805_2_340	Two-component transcriptional response regulator, LuxR family
	k141_74501_5197_6270	Macrolide-specific efflux protein MacA
	k141_84132_16810_17625	Potassium efflux system KefA protein / Small-conductance mechanosensitive channel
	k141_84132_26170_26319	S-ribosylhomocysteine lyase (EC 4.4.1.21) / Autoinducer-2 production protein LuxS
	k141_86664_17484_19199	Efflux ABC transporter, permease/ATP-binding protein
	k141_92378_486_1	Threonine efflux protein
	k141_96501_20406_17290	RND efflux system, inner membrane transporter
	k141_96501_54381_53713	Two-component transcriptional response regulator, LuxR family
SMP	k141_226206_28259_29047	Indole-3-glycerol phosphate synthase (EC 4.1.1.48)
	k141_256102_4034_4840	Phenazine biosynthesis protein PhzF like
	k141_270767_7705_8916	Tryptophan synthase (indole-salvaging) (EC 4.2.1.122)
	k141_283273_29238_31049	Indolepyruvate oxidoreductase subunit IorA (EC 1.2.7.8)
	k141_283273_31052_31588	Indolepyruvate oxidoreductase subunit IorB (EC 1.2.7.8)
SR	k141_120202_8778_8236	Thiol peroxidase, Tpx-type (EC 1.11.1.15)
	k141_148656_7879_7169	Putative formate dehydrogenase-specific chaperone
	k141_157021_18487_17636	Heat shock protein HtpX
	k141_164491_2275_3861	Inner membrane protein translocase and chaperone YidC, long form
	k141_164491_18313_16898	HtrA protease/chaperone protein / Serine protease (Protease DO) (EC 3.4.21.-)
	k141_164491_18485_19378	DnaJ-class molecular chaperone CbpA
	k141_164491_19397_19771	HspR, transcriptional repressor of DnaK operon
	k141_166959_108_572	Thiol peroxidase, Bcp-type (EC 1.11.1.15)
	k141_171593_5195_4620	Cold shock protein of CSP family / Excalibur calcium-binding domain
	k141_171593_5575_5282	Cold shock protein of CSP family
	k141_17911_41626_42102	Glutathione peroxidase (EC 1.11.1.9) / Thioredoxin peroxidase (EC 1.11.1.15)
	k141_192921_4412_3261	Chaperone protein HtpG
	k141_198008_18328_18083	Ribosome-associated heat shock protein implicated in the recycling of the 50S subunit (S4 paralog)
	k141_226206_19305_19024	Heat shock protein DnaJ
	k141_244311_298_564	Heat shock protein 10 kDa family chaperone GroES
	k141_244311_596_2236	Heat shock protein 60 kDa family chaperone GroEL
	k141_260183_45075_43189	Chaperone protein DnaK
	k141_260183_45659_45099	Heat shock protein GrpE
	k141_270432_7775_5202	Chaperone protein ClpB (ATP-dependent unfoldase)
	k141_287924_10797_11357	Thiol peroxidase, Tpx-type (EC 1.11.1.15)
	k141_287924_12792_12586	Copper(I) chaperone CopZ
	k141_301408_9025_8429	Superoxide dismutase [Fe] (EC 1.15.1.1)
	k141_31039_5840_4707	Chaperone protein DnaJ
	k141_318322_3739_3194	DJ-1/YajL/PfpI superfamily, includes chaperone protein YajL (former ThiJ), parkinsonism-associated protein DJ-1, peptidases PfpI, Hsp31
	k141_34227_14600_14941	Glutathione-dependent thiol reductase
	k141_5470_2206_1646	Putative oxidoreductase component of anaerobic dehydrogenases; Chaperone protein TorD
	k141_65206_29551_29766	Cold shock protein of CSP family
	k141_73967_9634_10371	Putative formate dehydrogenase-specific chaperone
	k141_74582_1183_2832	Oligopeptide transport substrate-binding protein / Glutathione ABC transporter, substrate-binding protein GsiB
	k141_96110_8169_9197	Cytochrome c551 peroxidase (EC 1.11.1.5)
ARG	Contig	Drug Class	Resistance Mechanism	AMR Gene Family	Antibiotic
	k141_132587_4	fluoroquinolone antibiotic; tetracycline antibiotic	antibiotic efflux	resistance-nodulation-cell division (RND) antibiotic efflux pump	tetracycline
	k141_219738_9	disinfecting agents and antiseptics	antibiotic efflux	small multidrug resistance (SMR) antibiotic efflux pump	benzalkonium chloride
	k141_256102_71	fluoroquinolone antibiotic; tetracycline antibiotic	antibiotic efflux	resistance-nodulation-cell division (RND) antibiotic efflux pump	tetracycline

## Sheet: APR209
	Contig	Function
HMR	k141_116714_20358_19159	Cobalt-zinc-cadmium resistance protein CzcA; Cation efflux system protein CusA
	k141_136344_21506_22417	Cobalt/zinc/cadmium resistance protein CzcD
	k141_150376_492_1814	BexA, multidrug efflux pump
	k141_183696_2201_3553	Na+-driven multidrug efflux pump
	k141_235575_2320_884	Multi antimicrobial extrusion protein (Na(+)/drug antiporter), MATE family of MDR efflux pumps
	k141_305173_28190_26835	Multidrug and toxin extrusion (MATE) family efflux pump YdhE/NorM, homolog
	k141_62517_9575_8202	Multi antimicrobial extrusion protein (Na(+)/drug antiporter), MATE family of MDR efflux pumps
	k141_9686_7033_8382	Na+-driven multidrug efflux pump
HDD	k141_156221_2712_1684	O-succinylbenzoate synthase (EC 4.2.1.113)
	k141_198940_10904_10338	Anthranilate synthase, amidotransferase component (EC 4.1.3.27) / Para-aminobenzoate synthase, amidotransferase component (EC 2.6.1.85)
	k141_208643_3596_4420	Multicopper polyphenol oxidase
	k141_21501_8381_7395	Para-aminobenzoate synthase, aminase component (EC 2.6.1.85)
MGE	k141_135089_2571_1372	Integrase
	k141_187370_13202_13972	Chromosome (plasmid) partitioning protein ParA
	k141_187370_13974_14861	Chromosome (plasmid) partitioning protein ParB
	k141_88939_830_2029	Site-specific tyrosine recombinase XerC
	k141_90591_16825_17775	Site-specific tyrosine recombinase XerD
	k141_93582_170_670	HNH homing endonuclease # Phage intron
	k141_93582_697_1149	Phage endolysin
PVD	k141_135300_15774_17030	Hemolysins and related proteins containing CBS domains
	k141_136148_8939_8286	Lipoprotein-releasing system ATP-binding protein LolD
	k141_139461_1641_76	Peptide chain release factor 3
	k141_14985_54143_55255	Peptide chain release factor 1
	k141_150535_3393_4355	Peptide chain release factor 2
	k141_150535_37855_37205	Predicted membrane protein, hemolysin III homolog
	k141_225252_3381_3722	Toxin HigB
	k141_271216_16754_15411	Hemolysins and related proteins containing CBS domains
	k141_305173_28190_26835	Multidrug and toxin extrusion (MATE) family efflux pump YdhE/NorM, homolog
	k141_307159_5044_4196	Peptide chain release factor N(5)-glutamine methyltransferase (EC 2.1.1.297)
	k141_60432_2088_805	Hemolysins and related proteins containing CBS domains
	k141_83567_34139_34957	Hemolysin A
	k141_83567_34985_35980	Hemolysin A
	k141_90591_13850_12618	Lipoprotein releasing system transmembrane protein LolC/LolE
	k141_94240_17353_18285	Ribosome small subunit biogenesis RbfA-release protein RsgA
QS	k141_112708_279_1	RND efflux system, inner membrane transporter
	k141_112708_1524_325	RND efflux system, membrane fusion protein
	k141_11359_1_2775	RND efflux system, inner membrane transporter
	k141_11359_2772_4151	Efflux transport system, outer membrane factor (OMF) lipoprotein
	k141_116714_20358_19159	Cobalt-zinc-cadmium resistance protein CzcA; Cation efflux system protein CusA
	k141_116714_23466_20371	CzcABC family efflux RND transporter, transmembrane protein
	k141_116714_24630_23479	Cation efflux system protein
	k141_148044_7348_8679	Efflux transport system, outer membrane factor (OMF) lipoprotein BT1212
	k141_150376_492_1814	BexA, multidrug efflux pump
	k141_151616_17030_13920	CzcABC family efflux RND transporter, transmembrane protein
	k141_151616_18234_17050	Cation efflux system protein
	k141_151616_21491_25330	CzcABC family efflux RND transporter, transmembrane protein
	k141_151616_25320_26795	Outer membrane efflux protein precursor
	k141_151616_26812_28383	CzcABC family efflux RND transporter, membrane fusion protein
	k141_154643_255_953	Two-component transcriptional response regulator, LuxR family BT1217
	k141_182277_2_2548	RND efflux system, inner membrane transporter
	k141_183696_2201_3553	Na+-driven multidrug efflux pump
	k141_183742_2565_733	Efflux ABC transporter, permease/ATP-binding protein
	k141_186203_18201_18761	Transcriptional regulator, LuxR family
	k141_198940_5720_5358	Two-component transcriptional response regulator, LuxR family
	k141_199437_3_497	Probable Co/Zn/Cd efflux system membrane fusion protein
	k141_213181_21608_18390	RND efflux system, inner membrane transporter
	k141_21384_17451_18911	Efflux transport system, outer membrane factor (OMF) lipoprotein BT_3905
	k141_21384_19946_21112	Efflux ABC transporter, permease protein
	k141_21384_21112_22359	Domain of unknown function / Efflux ABC transporter, permease protein
	k141_21384_22459_24291	Efflux ABC transporter, permease/ATP-binding protein
	k141_21581_5620_6384	Two-component transcriptional response regulator, LuxR family
	k141_21581_7092_7424	RND efflux system, inner membrane transporter
	k141_224193_21516_22244	Two-component transcriptional response regulator, LuxR family
	k141_228593_3_605	Efflux ABC transporter, permease protein
	k141_228748_1427_2083	Two-component transcriptional response regulator, LuxR family
	k141_235575_2320_884	Multi antimicrobial extrusion protein (Na(+)/drug antiporter), MATE family of MDR efflux pumps
	k141_263313_12642_13694	Potassium efflux system KefA protein / Small-conductance mechanosensitive channel
	k141_266556_6105_5341	Two-component transcriptional response regulator, LuxR family
	k141_298943_832_1920	putative cation efflux system protein
	k141_298943_1917_4994	CzcABC family efflux RND transporter, transmembrane protein
	k141_304356_3887_3276	Macrolide-specific ABC-type efflux carrier (TC 3.A.1.122.1)
	k141_305173_28190_26835	Multidrug and toxin extrusion (MATE) family efflux pump YdhE/NorM, homolog
	k141_307159_27627_26923	Two-component transcriptional response regulator, LuxR family
	k141_39556_4058_3321	Two-component transcriptional response regulator, LuxR family
	k141_62517_9575_8202	Multi antimicrobial extrusion protein (Na(+)/drug antiporter), MATE family of MDR efflux pumps
	k141_62517_20349_21233	Potassium efflux system KefA protein / Small-conductance mechanosensitive channel
	k141_66670_2028_721	Efflux transport system, outer membrane factor (OMF) lipoprotein BT_2498
	k141_79916_5357_4683	Two-component transcriptional response regulator, LuxR family
	k141_9686_7033_8382	Na+-driven multidrug efflux pump
	k141_99094_906_2171	outer membrane efflux protein
	k141_99094_3075_3992	Efflux ABC transporter, ATP-binding protein
	k141_99094_3985_4728	Efflux ABC transporter, ATP-binding protein / Efflux ABC transporter, ATP-binding protein
	k141_99094_4732_5835	Domain of unknown function / Efflux ABC transporter, permease protein
	k141_99094_5840_6787	Efflux ABC transporter, permease protein
SMP	k141_198940_9332_8544	Indole-3-glycerol phosphate synthase (EC 4.1.1.48)
	k141_312184_21807_21226	Indolepyruvate oxidoreductase subunit IorB (EC 1.2.7.8)
	k141_312184_23405_21810	Indolepyruvate oxidoreductase subunit IorA (EC 1.2.7.8)
	k141_33917_4609_3242	Tryptophan synthase (indole-salvaging) (EC 4.2.1.122)
	k141_66881_4976_4077	Phenazine biosynthesis protein PhzF like
SR	k141_11359_6825_6331	Glutathione peroxidase (EC 1.11.1.9) / Thioredoxin peroxidase (EC 1.11.1.15)
	k141_178765_5076_2488	Chaperone protein ClpB (ATP-dependent unfoldase)
	k141_178765_9611_9156	Thiol peroxidase, Bcp-type (EC 1.11.1.15)
	k141_178765_14101_16002	Chaperone protein DnaK
	k141_197458_7960_8340	DnaK suppressor protein, putative
	k141_205026_1569_1	Heat shock protein 60 kDa family chaperone GroEL
	k141_205026_1879_1607	Heat shock protein 10 kDa family chaperone GroES
	k141_213181_6889_5522	Periplasmic chaperone and peptidyl-prolyl cis-trans isomerase of outer membrane proteins SurA (EC 5.2.1.8)
	k141_213181_9329_7779	Periplasmic chaperone and peptidyl-prolyl cis-trans isomerase of outer membrane proteins SurA (EC 5.2.1.8)
	k141_21384_11259_10708	DJ-1/YajL/PfpI superfamily, includes chaperone protein YajL (former ThiJ), parkinsonism-associated protein DJ-1, peptidases PfpI, Hsp31
	k141_228593_1119_685	Small heat shock protein
	k141_236157_541_35	Thiol peroxidase, Tpx-type (EC 1.11.1.15)
	k141_236749_5188_4811	Lactoylglutathione lyase (EC 4.4.1.5)
	k141_246165_1274_657	Superoxide dismutase [Mn/Fe] (EC 1.15.1.1)
	k141_282290_11411_10995	Ribosome-associated heat shock protein implicated in the recycling of the 50S subunit (S4 paralog)
	k141_282350_7438_8049	Periplasmic chaperone of outer membrane proteins Skp / Outer membrane protein H precursor
	k141_285351_4756_4049	Zn-dependent protease with chaperone function PA4632
	k141_294351_16672_18513	Inner membrane protein translocase and chaperone YidC, long form
	k141_307159_11025_11540	Periplasmic chaperone of outer membrane proteins Skp / Outer membrane protein H precursor
	k141_4316_6488_7096	Heat shock protein GrpE
	k141_4316_7100_8275	Chaperone protein DnaJ
ARG	Contig	Drug Class	Resistance Mechanism	AMR Gene Family	Antibiotic
	k141_118112_3	nitroimidazole antibiotic	antibiotic inactivation	nitroimidazole reductase	metronidazole
	k141_118112_5	sulfonamide antibiotic	antibiotic target replacement	sulfonamide resistant sul	sulfamethoxazole
	k141_138521_3	nitroimidazole antibiotic	antibiotic inactivation	nitroimidazole reductase	metronidazole
	k141_195634_4	nitroimidazole antibiotic	antibiotic inactivation	nitroimidazole reductase	metronidazole
	k141_199903_15	glycopeptide antibiotic	antibiotic target alteration	glycopeptide resistance gene cluster; vanT	vancomycin

## Sheet: APR301
	Contig	Function
HMR	k141_111141_1689_3089	Multi antimicrobial extrusion protein (Na(+)/drug antiporter), MATE family of MDR efflux pumps
	k141_165180_4875_3973	Na+-driven multidrug efflux pump
	k141_20226_2773_3888	Cobalt-zinc-cadmium resistance protein
	k141_265970_6757_6179	Putative manganese efflux pump MntP
	k141_272135_3462_3977	Na+-driven multidrug efflux pump
	k141_73000_4099_3251	Cobalt-zinc-cadmium resistance protein
HDD	k141_116391_1450_419	O-succinylbenzoate synthase (EC 4.2.1.113)
	k141_309664_8547_9536	Para-aminobenzoate synthase, aminase component (EC 2.6.1.85)
	k141_323389_552_1	Multicopper polyphenol oxidase
	k141_87264_4512_3892	Anthranilate synthase, amidotransferase component (EC 4.1.3.27) / Para-aminobenzoate synthase, amidotransferase component (EC 2.6.1.85)
MGE	k141_115025_12847_11969	Site-specific tyrosine recombinase XerC
	k141_163809_1444_554	Chromosome (plasmid) partitioning protein ParB
	k141_163809_2269_1505	Chromosome (plasmid) partitioning protein ParA
	k141_211711_2609_2782	Tyrosine type site-specific recombinase, probable regulator for PS locus
	k141_211711_2832_3488	Tyrosine type site-specific recombinase, probable regulator for PS locus
	k141_237033_3538_2615	Site-specific tyrosine recombinase XerD
PVD	k141_124435_3651_4340	Lipoprotein-releasing system ATP-binding protein LolD
	k141_191043_1351_2667	Hemolysins and related proteins containing CBS domains
	k141_196207_2461_3393	Ribosome small subunit biogenesis RbfA-release protein RsgA
	k141_213704_2_667	Peptide chain release factor 1
	k141_241838_1366_371	Hemolysin A
	k141_241838_2214_1387	Hemolysin A
	k141_25706_11518_12789	Hemolysins and related proteins containing CBS domains
	k141_260163_717_1574	Peptide chain release factor N(5)-glutamine methyltransferase (EC 2.1.1.297)
	k141_269637_2185_956	Lipoprotein releasing system transmembrane protein LolC/LolE
	k141_30554_2992_1406	Peptide chain release factor 3
	k141_360839_2580_1639	Toxin HigB / Protein kinase domain of HipA
	k141_364211_3179_3835	Predicted membrane protein, hemolysin III homolog
	k141_99724_538_2	Peptide chain release factor 1
QS	k141_111141_1689_3089	Multi antimicrobial extrusion protein (Na(+)/drug antiporter), MATE family of MDR efflux pumps
	k141_121229_722_1201	S-ribosylhomocysteine lyase (EC 4.4.1.21) / Autoinducer-2 production protein LuxS
	k141_13324_5487_5837	RND efflux system, membrane fusion protein
	k141_143165_1583_2956	Outer membrane protein, RND efflux system precursor
	k141_143165_2980_4053	Efflux transporter, RND family, MFP subunit, AcrA/E family
	k141_143165_4064_7270	RND efflux system, inner membrane transporter
	k141_15835_1_1260	Outer membrane efflux protein
	k141_165180_4875_3973	Na+-driven multidrug efflux pump
	k141_17040_813_1538	Two-component transcriptional response regulator, LuxR family
	k141_176596_2892_538	Potassium efflux system KefA protein / Small-conductance mechanosensitive channel
	k141_208810_6721_7356	Two-component transcriptional response regulator, LuxR family
	k141_219353_1692_3617	CzcABC family efflux RND transporter, transmembrane protein
	k141_226514_2040_3407	Efflux transport system, outer membrane factor (OMF) lipoprotein
	k141_246223_2201_1122	Membrane fusion component of MSF-type tripartite multidrug efflux system
	k141_246223_3639_2233	Efflux transport system, outer membrane factor (OMF) lipoprotein BT_2795
	k141_265970_6757_6179	Putative manganese efflux pump MntP
	k141_272135_3462_3977	Na+-driven multidrug efflux pump
	k141_336535_4031_2166	Efflux ABC transporter, permease/ATP-binding protein
	k141_349566_3097_2363	Two-component transcriptional response regulator, LuxR family
	k141_353323_3400_2333	Efflux ABC transporter, permease protein
	k141_353323_4493_3405	Domain of unknown function / Efflux ABC transporter, permease protein
	k141_353323_5190_4498	Efflux ABC transporter, ATP-binding protein / Efflux ABC transporter, ATP-binding protein
	k141_360454_1361_87	Efflux ABC transporter, permease protein
	k141_360454_2530_1361	Efflux ABC transporter, permease protein
	k141_360454_5041_3542	Efflux transport system, outer membrane factor (OMF) lipoprotein BT_3905
	k141_5456_1692_2924	Outer membrane efflux protein
	k141_5456_3857_4702	Efflux ABC transporter, ATP-binding protein
	k141_77233_3821_4441	Transcriptional regulator, LuxR family
	k141_77233_5403_4447	Repair of Iron Centers di-iron protein / Transcriptional regulator, LuxR family
SMP	k141_552_4687_6066	Tryptophan synthase (indole-salvaging) (EC 4.2.1.122)
	k141_87264_9436_8642	Indole-3-glycerol phosphate synthase (EC 4.1.1.48)
SR	k141_100137_11553_10381	Chaperone protein DnaJ
	k141_100137_12192_11575	Heat shock protein GrpE
	k141_102062_216_890	DnaJ-class molecular chaperone CbpA
	k141_185767_7706_8272	DJ-1/YajL/PfpI superfamily, includes chaperone protein YajL (former ThiJ), parkinsonism-associated protein DJ-1, peptidases PfpI, Hsp31
	k141_198598_7661_7933	Heat shock protein 10 kDa family chaperone GroES
	k141_199084_2254_2520	Chaperone protein DnaJ
	k141_200610_12118_14172	Chaperone protein HtpG
	k141_213138_3281_5191	Chaperone protein DnaK
	k141_214812_5683_7620	Inner membrane protein translocase and chaperone YidC, long form
	k141_214812_24636_25049	Ribosome-associated heat shock protein implicated in the recycling of the 50S subunit (S4 paralog)
	k141_265970_2429_2929	Thiol peroxidase, Tpx-type (EC 1.11.1.15)
	k141_282777_4552_3029	Heat shock protein 60 kDa family chaperone GroEL
	k141_295815_3_92	Chaperone protein DnaK
	k141_300189_6520_5240	Chaperone protein ClpB (ATP-dependent unfoldase)
	k141_31417_1488_97	Periplasmic chaperone and peptidyl-prolyl cis-trans isomerase of outer membrane proteins SurA (EC 5.2.1.8)
	k141_359355_6154_5699	Thiol peroxidase, Bcp-type (EC 1.11.1.15)
	k141_39890_5291_5130	Heat shock protein HtpX (EC 3.4.24.-)
	k141_42852_1272_1	Chaperone protein ClpB (ATP-dependent unfoldase)
	k141_552_1685_2239	Glutathione peroxidase (EC 1.11.1.9) / Thioredoxin peroxidase (EC 1.11.1.15)
	k141_60010_3313_1865	Periplasmic chaperone and peptidyl-prolyl cis-trans isomerase of outer membrane proteins SurA (EC 5.2.1.8)
	k141_73000_1552_1992	hypothetical domain / Cold shock protein of CSP family
	k141_8223_6259_6642	DnaK suppressor protein, putative
ARG	Contig	Drug Class	Resistance Mechanism	AMR Gene Family	Antibiotic
	k141_29280_1	glycopeptide antibiotic	antibiotic target alteration	glycopeptide resistance gene cluster; vanT	vancomycin

## Sheet: APR302
	Contig	Function
HMR	k141_134916_7061_8413	Na+-driven multidrug efflux pump
	k141_140521_7795_8994	Cobalt-zinc-cadmium resistance protein CzcA; Cation efflux system protein CusA
	k141_157299_7048_8370	BexA, multidrug efflux pump
	k141_159643_12935_14290	Multidrug and toxin extrusion (MATE) family efflux pump YdhE/NorM, homolog
	k141_180176_446_1795	Multi antimicrobial extrusion protein (Na(+)/drug antiporter), MATE family of MDR efflux pumps
	k141_203709_26683_28056	Multi antimicrobial extrusion protein (Na(+)/drug antiporter), MATE family of MDR efflux pumps
	k141_285220_1618_689	Cobalt-zinc-cadmium resistance protein
	k141_300561_12472_13383	Cobalt/zinc/cadmium resistance protein CzcD
	k141_319902_5109_5903	Cobalt/zinc/cadmium resistance protein CzcD
	k141_79557_23073_24509	Multi antimicrobial extrusion protein (Na(+)/drug antiporter), MATE family of MDR efflux pumps
HDD	k141_16570_42_608	Anthranilate synthase, amidotransferase component (EC 4.1.3.27) / Para-aminobenzoate synthase, amidotransferase component (EC 2.6.1.85)
	k141_351928_5731_5829	Anthranilate synthase, amidotransferase component (EC 4.1.3.27) / Para-aminobenzoate synthase, amidotransferase component (EC 2.6.1.85)
	k141_364139_8166_7180	Para-aminobenzoate synthase, aminase component (EC 2.6.1.85)
MGE	k141_184545_13938_14822	Site-specific tyrosine recombinase XerC
	k141_300088_6281_5331	Site-specific tyrosine recombinase XerD
	k141_351544_11437_11246	Tyrosine type site-specific recombinase, Mpi regulator
	k141_60771_9159_9743	Integrase
	k141_86001_40016_39129	Chromosome (plasmid) partitioning protein ParB
	k141_86001_40788_40018	Chromosome (plasmid) partitioning protein ParA
PVD	k141_132394_2202_1552	Predicted membrane protein, hemolysin III homolog
	k141_159643_12935_14290	Multidrug and toxin extrusion (MATE) family efflux pump YdhE/NorM, homolog
	k141_163744_18236_16953	Hemolysins and related proteins containing CBS domains
	k141_235045_7592_6660	Ribosome small subunit biogenesis RbfA-release protein RsgA
	k141_251778_3477_1912	Peptide chain release factor 3
	k141_266511_4693_3845	Peptide chain release factor N(5)-glutamine methyltransferase (EC 2.1.1.297)
	k141_266511_51303_50650	Lipoprotein-releasing system ATP-binding protein LolD
	k141_288771_3326_2379	Toxin HigB / Protein kinase domain of HipA
	k141_300088_9256_10488	Lipoprotein releasing system transmembrane protein LolC/LolE
	k141_330459_7608_6646	Peptide chain release factor 2
	k141_330459_20467_19472	Hemolysin A
	k141_330459_21313_20495	Hemolysin A
	k141_365870_25170_26513	Hemolysins and related proteins containing CBS domains
	k141_375696_14377_13121	Hemolysins and related proteins containing CBS domains
	k141_382038_15976_14864	Peptide chain release factor 1
QS	k141_111334_18146_18706	Transcriptional regulator, LuxR family
	k141_134916_7061_8413	Na+-driven multidrug efflux pump
	k141_134916_23055_24386	Efflux transport system, outer membrane factor (OMF) lipoprotein BT1212
	k141_134916_28715_29413	Two-component transcriptional response regulator, LuxR family BT1217
	k141_140521_3523_4674	Cation efflux system protein
	k141_140521_4687_7782	CzcABC family efflux RND transporter, transmembrane protein
	k141_140521_7795_8994	Cobalt-zinc-cadmium resistance protein CzcA; Cation efflux system protein CusA
	k141_157299_7048_8370	BexA, multidrug efflux pump
	k141_159643_12935_14290	Multidrug and toxin extrusion (MATE) family efflux pump YdhE/NorM, homolog
	k141_180176_446_1795	Multi antimicrobial extrusion protein (Na(+)/drug antiporter), MATE family of MDR efflux pumps
	k141_203709_15909_15025	Potassium efflux system KefA protein / Small-conductance mechanosensitive channel
	k141_203709_26683_28056	Multi antimicrobial extrusion protein (Na(+)/drug antiporter), MATE family of MDR efflux pumps
	k141_25256_2340_769	CzcABC family efflux RND transporter, membrane fusion protein
	k141_25256_3832_2357	Outer membrane efflux protein precursor
	k141_25256_7763_3822	CzcABC family efflux RND transporter, transmembrane protein
	k141_266511_27274_26570	Two-component transcriptional response regulator, LuxR family
	k141_282357_6004_7836	Efflux ABC transporter, permease/ATP-binding protein
	k141_288771_13528_14292	Two-component transcriptional response regulator, LuxR family
	k141_295796_1727_2464	Two-component transcriptional response regulator, LuxR family
	k141_300561_18307_19479	outer membrane efflux protein
	k141_334926_4518_3670	Efflux ABC transporter, ATP-binding protein
	k141_341801_13534_11702	Efflux ABC transporter, permease/ATP-binding protein
	k141_341801_14881_13634	Domain of unknown function / Efflux ABC transporter, permease protein
	k141_341801_16047_14881	Efflux ABC transporter, permease protein
	k141_341801_18542_17082	Efflux transport system, outer membrane factor (OMF) lipoprotein BT_3905
	k141_351279_5487_4498	Efflux ABC transporter, permease protein
	k141_38276_15200_16507	Efflux transport system, outer membrane factor (OMF) lipoprotein BT_2498
	k141_38276_25664_26338	Two-component transcriptional response regulator, LuxR family
	k141_62742_747_1835	putative cation efflux system protein
	k141_62742_1832_4909	CzcABC family efflux RND transporter, transmembrane protein
	k141_62742_6508_9711	RND efflux system, inner membrane transporter
	k141_79557_3351_4535	Cation efflux system protein
	k141_79557_4555_7665	CzcABC family efflux RND transporter, transmembrane protein
	k141_79557_23073_24509	Multi antimicrobial extrusion protein (Na(+)/drug antiporter), MATE family of MDR efflux pumps
	k141_84315_3359_2631	Two-component transcriptional response regulator, LuxR family
	k141_88685_41606_38388	RND efflux system, inner membrane transporter
SMP	k141_16570_1614_2402	Indole-3-glycerol phosphate synthase (EC 4.1.1.48)
	k141_190962_1115_216	Phenazine biosynthesis protein PhzF like
	k141_363970_9076_8495	Indolepyruvate oxidoreductase subunit IorB (EC 1.2.7.8)
	k141_363970_10674_9079	Indolepyruvate oxidoreductase subunit IorA (EC 1.2.7.8)
SR	k141_114937_998_1270	Heat shock protein 10 kDa family chaperone GroES
	k141_114937_1308_2945	Heat shock protein 60 kDa family chaperone GroEL
	k141_135438_25092_25469	Lactoylglutathione lyase (EC 4.4.1.5)
	k141_157299_15535_14924	Periplasmic chaperone of outer membrane proteins Skp / Outer membrane protein H precursor
	k141_19850_11044_9203	Inner membrane protein translocase and chaperone YidC, long form
	k141_266511_10674_11189	Periplasmic chaperone of outer membrane proteins Skp / Outer membrane protein H precursor
	k141_316860_10287_9871	Ribosome-associated heat shock protein implicated in the recycling of the 50S subunit (S4 paralog)
	k141_316860_19103_16515	Chaperone protein ClpB (ATP-dependent unfoldase)
	k141_341801_24740_25291	DJ-1/YajL/PfpI superfamily, includes chaperone protein YajL (former ThiJ), parkinsonism-associated protein DJ-1, peptidases PfpI, Hsp31
	k141_351279_3984_4418	Small heat shock protein
	k141_88685_26887_25520	Periplasmic chaperone and peptidyl-prolyl cis-trans isomerase of outer membrane proteins SurA (EC 5.2.1.8)
	k141_88685_29327_27777	Periplasmic chaperone and peptidyl-prolyl cis-trans isomerase of outer membrane proteins SurA (EC 5.2.1.8)
ARG	Contig	Drug Class	Resistance Mechanism	AMR Gene Family	Antibiotic
	k141_256875_3	nitroimidazole antibiotic	antibiotic inactivation	nitroimidazole reductase	metronidazole

## Sheet: APR303
	Contig	Function
HMR	k141_77225_182_1135	Cobalt-zinc-cadmium resistance protein
HDD	k141_102616_759_1	Benzoate 1,2-dioxygenase, ferredoxin reductase component
	k141_102616_1269_781	Benzoate 1,2-dioxygenase beta subunit (EC 1.14.12.10)
	k141_102616_2656_1292	Benzoate 1,2-dioxygenase alpha subunit (EC 1.14.12.10)
	k141_128946_4166_2943	Putative n-hydroxybenzoate hydroxylase
	k141_149197_1122_91	2-polyprenylphenol hydroxylase and related flavodoxin oxidoreductases / CDP-6-deoxy-delta-3,4-glucoseen reductase
	k141_178757_4631_4020	benzoate MFS transporter BenK
	k141_193408_1496_261	Benzoate transport protein
	k141_19483_812_3	Catechol 1,2-dioxygenase (EC 1.13.11.1)
	k141_25190_777_1	Alkanesulfonates transport system permease protein
	k141_25190_1661_792	Alkanesulfonates transport system permease protein
	k141_25190_2783_1704	Alkanesulfonates-binding protein
	k141_25190_7485_6541	Alkanesulfonate utilization operon LysR-family regulator Cbl
	k141_332169_1_390	Benzoate 1,2-dioxygenase, ferredoxin reductase component
	k141_332169_1346_2224	benzoate MFS transporter BenK
	k141_340284_2272_3177	4-hydroxybenzoate polyprenyltransferase (EC 2.5.1.39)
	k141_34365_2051_3316	Ortho-halobenzoate 1,2-dioxygenase alpha-ISP protein OhbB
	k141_34365_3320_3805	Ortho-halobenzoate 1,2-dioxygenase beta-ISP protein OhbA
	k141_351650_334_1644	benzoate MFS transporter BenK
	k141_352680_3819_2626	3-hydroxybenzoate 6-monooxygenase (EC 1.14.13.24)
	k141_374517_3584_4711	ABC transporter, substrate-binding protein (cluster 4, leucine/isoleucine/valine/benzoate)
	k141_41868_2425_1220	P-hydroxybenzoate hydroxylase (EC 1.14.13.2)
	k141_50670_1895_204	2-polyprenyl-6-methoxyphenol hydroxylase and related FAD-dependent oxidoreductases
	k141_54867_1890_1063	Multicopper polyphenol oxidase
	k141_90450_1_561	Anthranilate synthase, amidotransferase component (EC 4.1.3.27) / Para-aminobenzoate synthase, amidotransferase component (EC 2.6.1.85)
	k141_94296_3257_3412	3-hydroxybenzoate 6-monooxygenase (EC 1.14.13.24)
MGE	k141_144531_1287_2387	Site-specific tyrosine recombinase XerC
	k141_159786_2035_1172	Site-specific tyrosine recombinase XerD
	k141_180773_1831_515	Prophage CP4-6 integrase
	k141_21496_495_1343	Integrase
	k141_257014_2084_1023	Site-specific recombinase
	k141_263331_1_471	Putative transposase InsQ for insertion sequence element IS609
	k141_275586_1797_3056	Probable integrase/recombinase protein
	k141_276277_1657_380	Putative transposase InsQ for insertion sequence element IS609
	k141_291118_489_1076	Site-specific recombinases, DNA invertase Pin homologs
	k141_296076_1073_3	Site-specific recombinase
	k141_325913_2024_2812	Chromosome (plasmid) partitioning protein ParA
	k141_42702_3_497	Integrase
	k141_50168_1920_2234	Phage integrase, site-specific serine recombinase
	k141_79966_4515_5678	Integrase
	k141_80831_2761_3546	Chromosome (plasmid) partitioning protein ParA
	k141_80831_4166_5173	Chromosome (plasmid) partitioning protein ParB
	k141_91372_1_714	Putative transposase InsQ for insertion sequence element IS609
	k141_9493_1982_705	Putative transposase InsQ for insertion sequence element IS609
PVD	k141_112865_34_363	Antitoxin PrlF
	k141_112865_360_866	Toxin YhaV
	k141_132369_960_1121	Hypothetical antitoxin
	k141_157526_1345_1656	RelE-like translational repressor toxin
	k141_157526_1649_1942	Antitoxin to RelE-like translational repressor toxin
	k141_162469_5388_5119	mRNA interferase RelE
	k141_162469_5602_5372	RelB/StbD replicon stabilization protein (antitoxin to RelE/StbE)
	k141_170003_2_1189	Lipoprotein releasing system transmembrane protein LolC/LolE
	k141_170003_1182_1877	Lipoprotein-releasing system ATP-binding protein LolD
	k141_18700_39_482	Ribosome association toxin RatA
	k141_195802_1374_2993	Peptide chain release factor 3
	k141_218713_29580_28666	Ribosome small subunit biogenesis RbfA-release protein RsgA
	k141_232721_7075_7374	Succinate dehydrogenase flavin-adding protein, antitoxin of CptAB toxin-antitoxin
	k141_234069_2937_2686	RelB/StbD replicon stabilization protein (antitoxin to RelE/StbE)
	k141_256805_2151_2020	Hypothetical antitoxin
	k141_256899_233_511	Toxin HigB
	k141_256899_523_837	Antitoxin HigA
	k141_276427_1328_1606	Toxin HigB
	k141_276427_1622_1930	Antitoxin HigA
	k141_290913_8397_8113	Antitoxin to RelE-like translational repressor toxin
	k141_298194_797_1003	Antitoxin to Toxin 1, PIN domain
	k141_315516_3135_2809	RelE-like translational repressor toxin
	k141_318831_478_756	Toxin HigB
	k141_318831_777_1067	Antitoxin HigA
	k141_35037_671_961	Antitoxin to RelE-like translational repressor toxin
	k141_377383_316_8	Hypothetical antitoxin
	k141_377383_629_336	Hypothetical toxin
	k141_382816_1148_1459	Hypothetical antitoxin
	k141_54867_3229_1904	Hemolysins and related proteins containing CBS domains
	k141_6222_5681_6709	Peptide chain release factor 1
QS	k141_132095_7438_6452	Two-component transcriptional response regulator, LuxR family
	k141_139622_9437_11287	Efflux ABC transporter, permease/ATP-binding protein Atu2242
	k141_155393_3160_2405	Efflux ABC transporter, permease protein
	k141_155393_4080_3157	Efflux ABC transporter, ATP-binding protein
	k141_168527_855_1	Auxin efflux carrier family protein
	k141_174627_1355_504	Two-component transcriptional response regulator, LuxR family
	k141_192007_525_1	Magnesium and cobalt efflux protein CorC
	k141_214040_595_2871	Efflux ABC transporter, permease/ATP-binding protein Reut_A2584
	k141_290913_8085_7426	Regulatory protein, LuxR:Response regulator receiver
	k141_314891_2721_2071	RND efflux system, inner membrane transporter
	k141_319160_3323_2694	Two-component transcriptional response regulator, LuxR family
	k141_32898_1541_3724	Bacteriocin/lantibiotic efflux ABC transporter, permease/ATP-binding protein
	k141_351409_4719_6071	Potassium efflux system KefA protein / Small-conductance mechanosensitive channel
	k141_351798_816_2117	RND efflux system, membrane fusion protein
	k141_351798_2120_2842	RND efflux system, inner membrane transporter
	k141_354848_2_886	Efflux ABC transporter, permease/ATP-binding protein Reut_A2584
	k141_356780_251_3	Auxin efflux carrier family protein
	k141_368585_2035_3174	RND efflux system, inner membrane transporter KPN_02144
	k141_370992_1197_2969	Efflux ABC transporter, permease/ATP-binding protein
	k141_50292_1_2832	RND efflux system, inner membrane transporter
	k141_67906_1399_1980	PAS domain with LuxR-type DNA-binding domain
	k141_73027_3_1349	Efflux transport system, outer membrane factor (OMF) lipoprotein
	k141_77417_1_2499	RND efflux system, inner membrane transporter
	k141_78069_239_3	RND efflux system, inner membrane transporter
	k141_78069_1387_239	RND efflux system, membrane fusion protein
SMP	k141_90450_1784_2581	Indole-3-glycerol phosphate synthase (EC 4.1.1.48)
SR	k141_101166_197_613	Lactoylglutathione lyase (EC 4.4.1.5)
	k141_111967_1556_2077	Chaperone protein HscB
	k141_111967_2093_3487	Chaperone protein HscA
	k141_154021_963_1967	Cytochrome c551 peroxidase (EC 1.11.1.5)
	k141_189162_2242_1691	Small heat shock protein
	k141_195058_989_3	Chaperone protein ClpB (ATP-dependent unfoldase)
	k141_206315_29_577	Heat shock protein GrpE
	k141_206315_688_2202	Chaperone protein DnaK
	k141_215670_2838_1195	Heat shock protein 60 kDa family chaperone GroEL
	k141_215670_3177_2887	Heat shock protein 10 kDa family chaperone GroES
	k141_238189_1846_1394	Ribosome-associated heat shock protein implicated in the recycling of the 50S subunit (S4 paralog)
	k141_240964_2280_1933	Glutathione-dependent thiol reductase
	k141_247115_426_1	Heat shock protein GrpE
	k141_251308_2094_976	S-(hydroxymethyl)glutathione dehydrogenase (EC 1.1.1.284)
	k141_257462_1454_3	Catalase-peroxidase KatG (EC 1.11.1.21)
	k141_258014_6472_5102	Periplasmic chaperone and peptidyl-prolyl cis-trans isomerase of outer membrane proteins SurA (EC 5.2.1.8)
	k141_271305_2528_2596	Heat shock protein 10 kDa family chaperone GroES
	k141_276837_2_2074	Chaperone protein ClpB (ATP-dependent unfoldase)
	k141_286142_60_1202	Chaperone protein DnaJ
	k141_315939_2_571	Hydroxyacylglutathione hydrolase (EC 3.1.2.6)
	k141_317861_1396_878	Periplasmic chaperone of outer membrane proteins Skp / Outer membrane protein H precursor
	k141_318318_229_2	Chaperone protein HtpG
	k141_338189_1_636	Chaperone protein HscA
	k141_340284_21874_22494	Glutathione S-transferase family protein
	k141_352851_12536_13603	DnaK-related protein
	k141_370185_2_118	DnaK-related protein
	k141_370185_130_2922	DnaK-related protein
	k141_50257_1847_168	Inner membrane protein translocase and chaperone YidC, long form
	k141_65185_4986_5462	Thiol peroxidase, Bcp-type (EC 1.11.1.15)
	k141_67889_1382_2788	Glutathione reductase (EC 1.8.1.7)
	k141_78634_2118_1465	Glutathione S-transferase (EC 2.5.1.18)
	k141_79875_4234_4815	Superoxide dismutase [Fe] (EC 1.15.1.1)

## Sheet: APR304
	Contig	Function
HMR	k141_154918_3610_2804	Cobalt/zinc/cadmium resistance protein CzcD
	k141_163252_8333_9319	Cobalt/zinc/cadmium resistance protein CzcD
	k141_243945_18882_19448	Putative manganese efflux pump MntP
	k141_265132_28465_27566	Cobalt/zinc/cadmium resistance protein CzcD
	k141_283950_638_1435	Metal transporter, ZIP family
	k141_37633_6906_8228	Multidrug efflux pump BexA
	k141_378152_3946_5289	Multi antimicrobial extrusion protein (Na(+)/drug antiporter), MATE family of MDR efflux pumps
	k141_75601_846_1	Multi antimicrobial extrusion protein (Na(+)/drug antiporter), MATE family of MDR efflux pumps
	k141_89242_7411_6062	Na+-driven multidrug efflux pump
HDD	k141_104914_13703_14767	O-succinylbenzoate synthase (EC 4.2.1.113)
	k141_232018_12986_12417	Anthranilate synthase, amidotransferase component (EC 4.1.3.27) / Para-aminobenzoate synthase, amidotransferase component (EC 2.6.1.85)
	k141_253666_7849_6392	Catalyzes the cleavage of p-aminobenzoyl-glutamate to p-aminobenzoate and glutamate, subunit B
	k141_340169_1551_508	Para-aminobenzoate synthase, aminase component (EC 2.6.1.85)
	k141_355417_16380_15580	Multicopper polyphenol oxidase
MGE	k141_225961_18208_19440	Tyrosine type site-specific recombinase
	k141_225961_20076_19798	Conjugative transposon protein TraH
	k141_308498_2579_1050	Transposase for insertion sequences IS1326/IS1353
	k141_315015_18676_19440	Chromosome (plasmid) partitioning protein ParA
	k141_315015_19459_20343	Chromosome (plasmid) partitioning protein ParB
	k141_51829_12772_11861	Site-specific tyrosine recombinase XerD
PVD	k141_104052_5871_6716	Peptide chain release factor N(5)-glutamine methyltransferase (EC 2.1.1.297)
	k141_13159_5576_4611	Peptide chain release factor 2
	k141_15505_3_479	Peptide chain release factor N(5)-glutamine methyltransferase (EC 2.1.1.297)
	k141_161591_7328_6105	Hemolysins and related proteins containing CBS domains
	k141_2258_3135_3788	Lipoprotein-releasing system ATP-binding protein LolD
	k141_225961_28698_29636	Toxin HigB / Protein kinase domain of HipA
	k141_280091_2510_4090	Peptide chain release factor 3
	k141_33362_45396_44821	Predicted membrane protein, hemolysin III homolog
	k141_336997_576_1	Hemolysin A
	k141_336997_1413_586	Hemolysin A
	k141_363161_32690_35224	ApeH acylamino-acid-releasing enzyme (EC 3.4.19.1)
	k141_384855_9318_10250	Ribosome small subunit biogenesis RbfA-release protein RsgA
	k141_51829_15795_17021	Lipoprotein releasing system transmembrane protein LolC/LolE
	k141_53663_14108_15424	Hemolysins and related proteins containing CBS domains
	k141_65876_11580_12830	Hemolysins and related proteins containing CBS domains
	k141_65876_21731_22558	Putative hemolysin
	k141_66807_1_534	Hemolysin A
	k141_77345_2569_3654	Peptide chain release factor 1
QS	k141_120859_3045_3965	Efflux ABC transporter, ATP-binding protein
	k141_13578_14313_15512	Cation efflux system protein
	k141_13578_15530_15643	CzcABC family efflux RND transporter, transmembrane protein
	k141_175033_4797_5504	Two-component transcriptional response regulator, LuxR family
	k141_243945_18882_19448	Putative manganese efflux pump MntP
	k141_245101_9184_10551	Two-component transcriptional response regulator, LuxR family
	k141_253666_14576_15226	Two-component transcriptional response regulator, LuxR family
	k141_253905_3919_2648	Efflux transport system, outer membrane factor (OMF) lipoprotein BT_1695
	k141_253905_6972_3922	RND efflux system, inner membrane transporter
	k141_253905_8037_6985	RND efflux system, membrane fusion protein
	k141_264196_8009_9271	outer membrane efflux protein
	k141_264196_10197_11111	Efflux ABC transporter, ATP-binding protein
	k141_264196_11108_11851	Efflux ABC transporter, ATP-binding protein
	k141_264196_11853_12284	Domain of unknown function / Efflux ABC transporter, permease protein
	k141_265132_4211_1086	RND efflux system, inner membrane transporter
	k141_265132_5258_4233	RND efflux system, membrane fusion protein
	k141_265132_6687_5296	Efflux transport system, outer membrane factor (OMF) lipoprotein BT_2688
	k141_265279_7573_10833	RND efflux system, inner membrane transporter
	k141_277874_148_909	Two-component transcriptional response regulator, LuxR family BT1217
	k141_278026_2147_3340	RND efflux system, membrane fusion protein
	k141_278026_3367_6558	RND efflux system, inner membrane transporter
	k141_278026_6563_7957	Efflux transport system, outer membrane factor (OMF) lipoprotein
	k141_279014_778_4650	CzcABC family efflux RND transporter, transmembrane protein
	k141_279014_6176_7813	CzcABC family efflux RND transporter, membrane fusion protein
	k141_280812_1071_1	RND efflux system, membrane fusion protein
	k141_284550_482_2290	CzcABC family efflux RND transporter, transmembrane protein
	k141_289603_1_3336	CzcABC family efflux RND transporter, transmembrane protein
	k141_290917_1892_3	CzcABC family efflux RND transporter, transmembrane protein
	k141_290917_2992_1889	CzcABC family efflux RND transporter, membrane fusion protein
	k141_305667_1578_2939	Two-component transcriptional response regulator, LuxR family
	k141_306781_296_1405	Efflux ABC transporter, permease protein
	k141_320487_2241_1	RND efflux system, inner membrane transporter
	k141_338508_7312_8631	Efflux transport system, outer membrane factor (OMF) lipoprotein BT1212
	k141_338508_13087_13848	Two-component transcriptional response regulator, LuxR family BT1217
	k141_348635_30627_33731	RND multidrug efflux transporter; Acriflavin resistance protein
	k141_355417_24981_24208	Two-component transcriptional response regulator, LuxR family
	k141_355417_27309_26023	Efflux transport system, outer membrane factor (OMF) lipoprotein BT_1267
	k141_355417_30344_27312	RND efflux system, inner membrane transporter
	k141_355417_31543_30347	RND efflux system, membrane fusion protein
	k141_363161_30444_31826	MATE efflux family protein
	k141_365056_3_206	CzcABC family efflux RND transporter, transmembrane protein
	k141_365056_1698_4616	RND efflux system, inner membrane transporter
	k141_37633_6906_8228	Multidrug efflux pump BexA
	k141_378152_3946_5289	Multi antimicrobial extrusion protein (Na(+)/drug antiporter), MATE family of MDR efflux pumps
	k141_380613_7968_6721	Domain of unknown function / Efflux ABC transporter, permease protein
	k141_380613_9162_7981	Efflux ABC transporter, permease protein
	k141_380613_11537_10179	Efflux transport system, outer membrane factor (OMF) lipoprotein BT_3905
	k141_39125_7544_8338	Formate efflux transporter FocA
	k141_64332_12502_11834	Two-component transcriptional response regulator, LuxR family
	k141_75601_846_1	Multi antimicrobial extrusion protein (Na(+)/drug antiporter), MATE family of MDR efflux pumps
	k141_82967_20334_18487	Efflux ABC transporter, permease/ATP-binding protein
	k141_89242_7411_6062	Na+-driven multidrug efflux pump
	k141_89815_3481_4239	Two-component transcriptional response regulator, LuxR family
	k141_93728_2_412	RND efflux system, inner membrane transporter
SMP	k141_116208_4408_6006	Indolepyruvate oxidoreductase subunit IorA (EC 1.2.7.8)
	k141_116208_6003_6584	Indolepyruvate oxidoreductase subunit IorB (EC 1.2.7.8)
	k141_228462_1783_2256	Tryptophan synthase (indole-salvaging) (EC 4.2.1.122)
	k141_232018_11378_10587	Indole-3-glycerol phosphate synthase (EC 4.1.1.48)
	k141_233953_15201_15380	Tryptophan synthase (indole-salvaging) (EC 4.2.1.122)
	k141_258584_2827_1508	Tryptophan synthase (indole-salvaging) (EC 4.2.1.122)
SR	k141_128415_958_581	Lactoylglutathione lyase (EC 4.4.1.5)
	k141_129344_13889_14368	Glutathione peroxidase (EC 1.11.1.9) / Thioredoxin peroxidase (EC 1.11.1.15)
	k141_134161_2623_2243	DnaK suppressor protein, putative
	k141_152648_15313_14888	Ribosome-associated heat shock protein implicated in the recycling of the 50S subunit (S4 paralog)
	k141_22145_2228_1680	Glutathione peroxidase (EC 1.11.1.9) / Thioredoxin peroxidase (EC 1.11.1.15)
	k141_250975_10029_11927	Inner membrane protein translocase and chaperone YidC, long form
	k141_253666_2782_2321	Small heat shock protein
	k141_283950_3166_1526	Heat shock protein 60 kDa family chaperone GroEL
	k141_283950_3472_3203	Heat shock protein 10 kDa family chaperone GroES
	k141_327676_4234_4884	Superoxide dismutase [Mn/Fe] (EC 1.15.1.1)
	k141_333464_14071_14727	Periplasmic chaperone and peptidyl-prolyl cis-trans isomerase of outer membrane proteins SurA (EC 5.2.1.8)
	k141_333464_15612_15719	Periplasmic chaperone and peptidyl-prolyl cis-trans isomerase of outer membrane proteins SurA (EC 5.2.1.8)
	k141_33362_9694_11742	Chaperone protein HtpG
	k141_340943_6788_6330	Thiol peroxidase, Bcp-type (EC 1.11.1.15)
	k141_348635_8254_9045	Zn-dependent protease with chaperone function PA4632
	k141_355417_38870_38370	Thiol peroxidase, Tpx-type (EC 1.11.1.15)
	k141_363161_16273_15116	Chaperone protein DnaJ
	k141_363161_16874_16290	Heat shock protein GrpE
	k141_363161_28386_26881	HtrA protease/chaperone protein
	k141_366579_6004_3413	Chaperone protein ClpB (ATP-dependent unfoldase)
	k141_53663_9939_8023	Chaperone protein DnaK
	k141_66807_9565_8204	Periplasmic chaperone and peptidyl-prolyl cis-trans isomerase of outer membrane proteins SurA (EC 5.2.1.8)
	k141_76634_310_855	DJ-1/YajL/PfpI superfamily, includes chaperone protein YajL (former ThiJ), parkinsonism-associated protein DJ-1, peptidases PfpI, Hsp31
	k141_91465_6280_4799	Catalase KatE (EC 1.11.1.6)
ARG	Contig	Drug Class	Resistance Mechanism	AMR Gene Family	Antibiotic
	k141_103729_3	glycopeptide antibiotic	antibiotic target alteration	glycopeptide resistance gene cluster; vanT	vancomycin
	k141_225961_26	tetracycline antibiotic	antibiotic target protection	tetracycline-resistant ribosomal protection protein	tetracycline; doxycycline; minocycline; chlortetracycline; demeclocycline; oxytetracycline

## Sheet: APR306
	Contig	Function
HMR	k141_326147_877_2022	ABC-type efflux pump membrane fusion component YbhG
	k141_326147_2022_3815	ABC-type efflux pump, duplicated ATPase component YbhF
	k141_326147_3812_4957	ABC-type efflux pump permease component YbhS
	k141_326147_4965_6086	ABC-type efflux pump permease component YbhR
	k141_63111_2099_846	Cobalt-zinc-cadmium resistance protein
HDD	k141_121534_13770_15035	2-polyprenyl-6-methoxyphenol hydroxylase
	k141_190063_8035_7022	2-polyprenylphenol hydroxylase and related flavodoxin oxidoreductases / CDP-6-deoxy-delta-3,4-glucoseen reductase
	k141_191765_9762_10586	4-hydroxybenzoate polyprenyltransferase (EC 2.5.1.39)
	k141_191765_10595_12076	3-polyprenyl-4-hydroxybenzoate carboxy-lyase (EC 4.1.1.98)
	k141_265708_2122_4038	Para-aminobenzoate synthase, aminase component (EC 2.6.1.85) / Aminodeoxychorismate lyase (EC 4.1.3.38)
	k141_274641_9661_8417	2-polyprenylphenol hydroxylase
	k141_314017_5998_5786	ABC transporter, substrate-binding protein (cluster 4, leucine/isoleucine/valine/benzoate)
	k141_376015_156_920	Multicopper polyphenol oxidase
MGE	k141_166471_10190_8502	Site-specific recombinase
	k141_274543_5236_4322	Chromosome (plasmid) partitioning protein ParB
	k141_274543_6026_5250	Chromosome (plasmid) partitioning protein ParA
	k141_280674_4242_5165	Site-specific tyrosine recombinase XerD
	k141_372653_10991_9963	Site-specific tyrosine recombinase XerC
	k141_63111_43505_42345	Transposase InsI for insertion sequence element IS30
PVD	k141_153019_12222_11380	Peptide chain release factor 2
	k141_280005_2321_1614	Lipoprotein-releasing system ATP-binding protein LolD
	k141_280005_3630_2314	Lipoprotein releasing system transmembrane protein LolC/LolE
	k141_280005_18337_19245	Ribosome small subunit biogenesis RbfA-release protein RsgA
	k141_280674_32141_32947	Putative hemolysin
	k141_280674_42376_41054	Toxin HigB / Protein kinase domain of HipA
	k141_314592_6843_8159	Hemolysins and related proteins containing CBS domains
	k141_50850_3650_3216	Ribosome association toxin RatA
	k141_50850_43752_42475	Toxin HigB / Protein kinase domain of HipA
	k141_50850_44782_44195	Toxin HigB / Protein kinase domain of HipA
	k141_53868_2251_560	Peptide chain release factor 3
	k141_53868_5262_4384	Peptide chain release factor N(5)-glutamine methyltransferase (EC 2.1.1.297)
	k141_53868_6349_5267	Peptide chain release factor 1
QS	k141_102450_1470_1	Multidrug efflux system EmrAB-OMF, inner-membrane proton/drug antiporter EmrB (MFS type)
	k141_102450_2324_1470	Multidrug efflux system EmrAB-OMF, membrane fusion component EmrA
	k141_102450_3799_2321	Outer membrane factor (OMF) lipoprotein associated wth EmrAB-OMF efflux system
	k141_117778_32638_31088	Outer membrane factor (OMF) lipoprotein associated wth MdtABC efflux system
	k141_117778_35829_32635	Multidrug efflux system MdtABC-TolC, inner-membrane proton/drug antiporter MdtC (RND type)
	k141_117778_38954_35826	Multidrug efflux system MdtABC-TolC, inner-membrane proton/drug antiporter MdtB (RND type)
	k141_117778_40252_38951	Multidrug efflux system MdtABC-TolC, membrane fusion component MdtA
	k141_117778_47241_50381	CzcABC family efflux RND transporter, transmembrane protein
	k141_166471_3550_1163	Efflux ABC transporter, permease/ATP-binding protein Reut_A2584
	k141_191765_12569_14368	Efflux ABC transporter, permease/ATP-binding protein mlr7818
	k141_280674_48307_49197	Magnesium and cobalt efflux protein CorC
	k141_314592_8250_9584	CzcABC family efflux RND transporter, outer membrane protein
	k141_314592_9589_11094	CzcABC family efflux RND transporter, membrane fusion protein
	k141_314592_11101_14196	CzcABC family efflux RND transporter, transmembrane protein
	k141_314592_14208_14561	Putative regulatory protein clustered with metal efflux genes, P-II family
	k141_326147_877_2022	ABC-type efflux pump membrane fusion component YbhG
	k141_326147_2022_3815	ABC-type efflux pump, duplicated ATPase component YbhF
	k141_326147_3812_4957	ABC-type efflux pump permease component YbhS
	k141_326147_4965_6086	ABC-type efflux pump permease component YbhR
	k141_376015_5878_7119	RND efflux system, membrane fusion protein
	k141_376015_7138_10269	RND efflux system, inner membrane transporter
	k141_376015_10262_11680	Efflux transport system, outer membrane factor (OMF) lipoprotein
	k141_63111_10363_13563	RND efflux system, inner membrane transporter
	k141_63111_13563_15059	Efflux transport system, outer membrane factor (OMF) lipoprotein
	k141_87210_14035_13283	Efflux ABC transporter, permease protein
	k141_87210_14975_14028	Efflux ABC transporter, ATP-binding protein
	k141_98015_2096_2836	Two-component transcriptional response regulator, LuxR family
SMP	k141_308494_9772_9296	Tryptophan synthase (indole-salvaging) (EC 4.2.1.122)
	k141_329206_8883_10253	Tryptophan synthase (indole-salvaging) (EC 4.2.1.122)
SR	k141_117778_16009_17436	HtrA protease/chaperone protein
	k141_121534_7245_5902	Periplasmic chaperone and peptidyl-prolyl cis-trans isomerase of outer membrane proteins SurA (EC 5.2.1.8)
	k141_125222_1_213	Chaperone protein ClpB (ATP-dependent unfoldase)
	k141_148680_696_1307	Glutathione S-transferase family protein
	k141_15172_7311_7757	Copper metallochaperone PCu(A)C, inserts Cu(I) into cytochrome oxidase subunit II
	k141_153019_4553_3423	Zn-dependent protease with chaperone function
	k141_159922_753_1796	Chaperone protein DnaJ
	k141_191765_7415_6351	Cytochrome c551 peroxidase (EC 1.11.1.5)
	k141_194045_10814_10269	Thiol peroxidase, Bcp-type (EC 1.11.1.15)
	k141_194045_13091_12723	Asenic metallochaperone ArsD, transfers trivalent metalloids to ArsAB pump
	k141_206076_1520_375	Chaperone protein DnaJ
	k141_206076_3532_1604	Chaperone protein DnaK
	k141_206076_4193_3663	Heat shock protein GrpE
	k141_223103_2990_2406	Superoxide dismutase [Fe] (EC 1.15.1.1)
	k141_244524_15858_15394	Thiol peroxidase, Bcp-type (EC 1.11.1.15)
	k141_265708_80_283	Cold shock protein of CSP family
	k141_280005_8429_6534	Chaperone protein HtpG
	k141_296134_5625_3721	Chaperone protein HscA
	k141_296134_6221_5670	Chaperone protein HscB
	k141_30916_2677_1805	Hydroxyacylglutathione hydrolase (EC 3.1.2.6)
	k141_30916_7116_7466	Glutathione-dependent thiol reductase
	k141_329206_18410_19045	Glutathione peroxidase (EC 1.11.1.9)
	k141_335533_4874_2715	Catalase-peroxidase KatG (EC 1.11.1.21)
	k141_335995_19281_20900	Inner membrane protein translocase and chaperone YidC, long form
	k141_340905_62_3	Cold shock protein of CSP family
	k141_340905_5546_5818	Thiol peroxidase, Tpx-type (EC 1.11.1.15)
	k141_350282_3374_3820	Cytochrome c-type biogenesis protein CcmE, heme chaperone
	k141_361982_1693_2	Chaperone protein ClpB (ATP-dependent unfoldase)
	k141_361982_12337_12732	Lactoylglutathione lyase (EC 4.4.1.5)
	k141_50850_14501_13977	Periplasmic chaperone of outer membrane proteins Skp / Outer membrane protein H precursor
ARG	Contig	Drug Class	Resistance Mechanism	AMR Gene Family	Antibiotic
	k141_376015_9	fluoroquinolone antibiotic; tetracycline antibiotic	antibiotic efflux	resistance-nodulation-cell division (RND) antibiotic efflux pump	tetracycline

[truncated: 4 more sheets: APR307, APR308, APR310, APR314]
